# Supplementary material
Source: PubMed Central journal article supplement (PMC8721742)
Supplement: NIHMS1765544-supplement-1.pdf [file NIHMS1765544-supplement-1.pdf]

## Search Strategy for Ovid Embase.

Additional database searches provided upon request: [Alyssa.grimshaw@yale.edu](mailto:Alyssa.grimshaw@yale.edu)

1. exp malignant plasmacytoma/ or exp plasmacytoma cell/
2. (Myelomatos\$ or multiple\* myeloma\* or (Plasma\$Cell adj3 Myeloma\*) or Kahler Disease or (myeloma\* adj3 multiple\*) or plasmacytoma\* or Plasmocytoma\* or plasma cell tumo\$r\*).mp.
3. 1 or 2
4. ((new\* or first\* or original\* or initial or preliminary) adj3 diagnos\*).mp.
5. (untreated or unchecked or undiagnosed).mp.
6. 4 or 5
7. 3 and 6
8. exp aged/
9. (elderly or senior\* or old or older or elder or retire\* or pension\* or geriatric\* or gerontol\* or medicare).mp.
10. (advanced and (age\* or year\*)).mp.
11. (denied transplant\* or transplant ineligible\* or unstabl\* or terminal\* or too sick or frail or fragile).mp.
12. 8 or 9 or 10 or 11
13. 7 and 12
14. (randomized control trial or RCT).mp.
15. exp controlled clinical trial/
16. ((random\* or clinical or placebo) and (trial\* or stud\* or group\*)).mp.
17. 14 or 15 or 16
18. 13 and 17
19. Limit 18 to English language

### Notation and modeling of toxicity:

The notation and model description is as follows: Let  $s = 1, \dots, S$  index the studies,  $t = 1, \dots, T$  index the treatments,  $a = 1, \dots, A$  index the adverse effects, and  $c = 1, \dots, C$  index the treatment components. A  $T \times C$  design matrix  $X$  defines the components of each treatment, so that  $T_{tc} = 1$  if component  $c$  is part of the treatment combination  $t$ , and  $T_{tc} = 0$  otherwise. Let  $Y_{sta}$  denote the number of adverse events of type  $a$  that occurred among the  $N_{st}$  patients in the arm receiving treatment  $t$  in study  $s$ . This value may or may not be reported as indicated by the value  $\Delta_{sta}$ , which equals 1 if  $Y_{sta}$  is reported and is 0 otherwise. If a study did not report the prevalence of a certain adverse event then its prevalence was lower than the prevalence of the most common adverse event in the study. The following model was assumed for the data:

$$\begin{aligned} Y_{sta} &\sim \text{Binomial}(N_{st}, p_{sta}) \\ \Delta_{sta} &= I(Y_{sta}/N_{sta} \geq C_{sa}) \\ \Phi(p_{sta}) &= \mu_{ta} + v_{st} + \tau_a \omega_{sa} \\ \mu_{ta} &= \beta_{0a} + X^T \beta_a + \eta_{ta} \\ v_s &= (v_{s1}, \dots, v_{sT}) \sim \text{MVN}(0, \sigma^2 \text{CS}(\rho)) \\ \omega_s &= (\omega_{s1}, \dots, \omega_{sA}) \sim \text{MVN}(0, \Psi) \end{aligned}$$

where  $\Phi(\cdot)$  denotes the standard normal cdf,  $\text{CS}(\rho)$  denotes the compound symmetry correlation matrix with 1 on the diagonal, and  $\rho$  in the off-diagonal positions, and  $I_A$  is the  $A \times A$  identity matrix.

In this model,  $\mu_{ta}$  measures the fixed effect of treatment  $t$  on adverse event  $a$  on the probit scale,  $v_s$  is the vector of the study-specific effects of treatment  $t$  on all adverse effects, while  $\omega_s$  captures the correlation between adverse effects with adverse-effect-specific variability  $\tau_a$ . An additive linear model based on the treatment components is assumed for the treatment effect  $\mu_{ta}$ , with an interaction term  $\eta_{ta}$  allowing for deviations from this additivity.

The following prior distributions were used for the parameters:

$$\begin{aligned} \tau_a &\sim N^+(0, 1) \\ \eta_{ta} &\sim N(0, 1) \\ \beta_{0a} &\sim N(-3, 2) \end{aligned}$$

$$\beta_{ca} \sim N^+(0,0.5)$$

$$\sigma \sim N^+(0,1)$$

$$\Psi^{-1} \sim \text{Wishart}(I_A, A + 1)$$

$$\rho \sim U\left(-\frac{1}{T+1}, 1\right)$$

where  $N$  denotes the normal distribution,  $U$  is the uniform distribution, and  $N^+$  is the half-normal distribution.

These are moderately informative priors selected based on considerations of the plausible ranges of the parameters.

**Table S1: PRISMA NMA Checklist of Items to Include When Reporting A Systematic Review Involving a Network Meta-analysis**

| Section/Topic                          | Item #    | Checklist Item                                                                                                                                                                                                                                                                                                                                                                                                                                                                                                                                                                                                                                                                                                                                                                          | Reported on Page #          |
|----------------------------------------|-----------|-----------------------------------------------------------------------------------------------------------------------------------------------------------------------------------------------------------------------------------------------------------------------------------------------------------------------------------------------------------------------------------------------------------------------------------------------------------------------------------------------------------------------------------------------------------------------------------------------------------------------------------------------------------------------------------------------------------------------------------------------------------------------------------------|-----------------------------|
| <b>TITLE</b>                           |           |                                                                                                                                                                                                                                                                                                                                                                                                                                                                                                                                                                                                                                                                                                                                                                                         |                             |
| Title                                  | 1         | Identify the report as a systematic review <i>incorporating a network meta-analysis (or related form of meta-analysis)</i> .                                                                                                                                                                                                                                                                                                                                                                                                                                                                                                                                                                                                                                                            | 1                           |
| <b>ABSTRACT</b>                        |           |                                                                                                                                                                                                                                                                                                                                                                                                                                                                                                                                                                                                                                                                                                                                                                                         |                             |
| Structured summary                     | 2         | Provide a structured summary including, as applicable:<br><b>Background:</b> main objectives<br><b>Methods:</b> data sources; study eligibility criteria, participants, and interventions; study appraisal; and <i>synthesis methods, such as network meta-analysis</i> .<br><b>Results:</b> number of studies and participants identified; summary estimates with corresponding confidence/credible intervals; <i>treatment rankings may also be discussed. Authors may choose to summarize pairwise comparisons against a chosen treatment included in their analyses for brevity.</i><br><b>Discussion/Conclusions:</b> limitations; conclusions and implications of findings.<br><b>Other:</b> primary source of funding; systematic review registration number with registry name. | 2                           |
| <b>INTRODUCTION</b>                    |           |                                                                                                                                                                                                                                                                                                                                                                                                                                                                                                                                                                                                                                                                                                                                                                                         |                             |
| Rationale                              | 3         | Describe the rationale for the review in the context of what is already known, <i>including mention of why a network meta-analysis has been conducted</i> .                                                                                                                                                                                                                                                                                                                                                                                                                                                                                                                                                                                                                             | 3                           |
| Objectives                             | 4         | Provide an explicit statement of questions being addressed, with reference to participants, interventions, comparisons, outcomes, and study design (PICOS).                                                                                                                                                                                                                                                                                                                                                                                                                                                                                                                                                                                                                             | 3                           |
| <b>METHODS</b>                         |           |                                                                                                                                                                                                                                                                                                                                                                                                                                                                                                                                                                                                                                                                                                                                                                                         |                             |
| Protocol and registration              | 5         | Indicate whether a review protocol exists and if and where it can be accessed (e.g., Web address); and, if available, provide registration information, including registration number.                                                                                                                                                                                                                                                                                                                                                                                                                                                                                                                                                                                                  | 4                           |
| Eligibility criteria                   | 6         | Specify study characteristics (e.g., PICOS, length of follow-up) and report characteristics (e.g., years considered, language, publication status) used as criteria for eligibility, giving rationale. <i>Clearly describe eligible treatments included in the treatment network, and note whether any have been clustered or merged into the same node (with justification)</i> .                                                                                                                                                                                                                                                                                                                                                                                                      | 5                           |
| Information sources                    | 7         | Describe all information sources (e.g., databases with dates of coverage, contact with study authors to identify additional studies) in the search and date last searched.                                                                                                                                                                                                                                                                                                                                                                                                                                                                                                                                                                                                              | 4                           |
| Search                                 | 8         | Present full electronic search strategy for at least one database, including any limits used, such that it could be repeated.                                                                                                                                                                                                                                                                                                                                                                                                                                                                                                                                                                                                                                                           | Supplementary Appendix 4, 5 |
| Study selection                        | 9         | State the process for selecting studies (i.e., screening, eligibility, included in systematic review, and, if applicable, included in the meta-analysis).                                                                                                                                                                                                                                                                                                                                                                                                                                                                                                                                                                                                                               |                             |
| Data collection process                | 10        | Describe method of data extraction from reports (e.g., piloted forms, independently, in duplicate) and any processes for obtaining and confirming data from investigators.                                                                                                                                                                                                                                                                                                                                                                                                                                                                                                                                                                                                              | 5                           |
| Data items                             | 11        | List and define all variables for which data were sought (e.g., PICOS, funding sources) and any assumptions and simplifications made.                                                                                                                                                                                                                                                                                                                                                                                                                                                                                                                                                                                                                                                   | 6                           |
| <b>Geometry of the network</b>         | <b>S1</b> | Describe methods used to explore the geometry of the treatment network under study and potential biases related to it. This should include how the evidence base has been graphically summarized for presentation, and what characteristics were compiled and used to describe the evidence base to readers.                                                                                                                                                                                                                                                                                                                                                                                                                                                                            | 6                           |
| Risk of bias within individual studies | 12        | Describe methods used for assessing risk of bias of individual studies (including specification of whether this was done at the study or outcome level), and how this information is to be used in any data synthesis.                                                                                                                                                                                                                                                                                                                                                                                                                                                                                                                                                                  | 5                           |

|                                          |           |                                                                                                                                                                                                                                                                                                                                                                                                                                                              |                                          |
|------------------------------------------|-----------|--------------------------------------------------------------------------------------------------------------------------------------------------------------------------------------------------------------------------------------------------------------------------------------------------------------------------------------------------------------------------------------------------------------------------------------------------------------|------------------------------------------|
| Summary measures                         | 13        | State the principal summary measures (e.g., risk ratio, difference in means). <i>Also describe the use of additional summary measures assessed, such as treatment rankings and surface under the cumulative ranking curve (SUCRA) values, as well as modified approaches used to present summary findings from meta-analyses.</i>                                                                                                                            | 5                                        |
| Planned methods of analysis              | 14        | Describe the methods of handling data and combining results of studies for each network meta-analysis. This should include, but not be limited to: <ul style="list-style-type: none"> <li>• <i>Handling of multi-arm trials;</i></li> <li>• <i>Selection of variance structure;</i></li> <li>• <i>Selection of prior distributions in Bayesian analyses; and</i></li> <li>• <i>Assessment of model fit.</i></li> </ul>                                       | 6                                        |
| <b>Assessment of Inconsistency</b>       | <b>S2</b> | Describe the statistical methods used to evaluate the agreement of direct and indirect evidence in the treatment network(s) studied. Describe efforts taken to address its presence when found.                                                                                                                                                                                                                                                              | 6                                        |
| Risk of bias across studies              | 15        | Specify any assessment of risk of bias that may affect the cumulative evidence (e.g., publication bias, selective reporting within studies).                                                                                                                                                                                                                                                                                                                 | 6                                        |
| Additional analyses                      | 16        | Describe methods of additional analyses if done, indicating which were pre-specified. This may include, but not be limited to, the following: <ul style="list-style-type: none"> <li>• Sensitivity or subgroup analyses;</li> <li>• Meta-regression analyses;</li> <li>• <i>Alternative formulations of the treatment network; and</i></li> <li>• <i>Use of alternative prior distributions for Bayesian analyses (if applicable).</i></li> </ul>            | 10, Supplementary Appendix               |
| <b>RESULTS†</b>                          |           |                                                                                                                                                                                                                                                                                                                                                                                                                                                              |                                          |
| Study selection                          | 17        | Give numbers of studies screened, assessed for eligibility, and included in the review, with reasons for exclusions at each stage, ideally with a flow diagram.                                                                                                                                                                                                                                                                                              | 7. Figure 1                              |
| <b>Presentation of network structure</b> | <b>S3</b> | Provide a network graph of the included studies to enable visualization of the geometry of the treatment network.                                                                                                                                                                                                                                                                                                                                            | Figure 2                                 |
| <b>Summary of network geometry</b>       | <b>S4</b> | Provide a brief overview of characteristics of the treatment network. This may include commentary on the abundance of trials and randomized patients for the different interventions and pairwise comparisons in the network, gaps of evidence in the treatment network, and potential biases reflected by the network structure.                                                                                                                            | 8                                        |
| Study characteristics                    | 18        | For each study, present characteristics for which data were extracted (e.g., study size, PICOS, follow-up period) and provide the citations.                                                                                                                                                                                                                                                                                                                 | Table 1                                  |
| Risk of bias within studies              | 19        | Present data on risk of bias of each study and, if available, any outcome level assessment.                                                                                                                                                                                                                                                                                                                                                                  | Figure S1                                |
| Results of individual studies            | 20        | For all outcomes considered (benefits or harms), present, for each study: 1) simple summary data for each intervention group, and 2) effect estimates and confidence intervals. <i>Modified approaches may be needed to deal with information from larger networks.</i>                                                                                                                                                                                      | Table S2, S3                             |
| Synthesis of results                     | 21        | Present results of each meta-analysis done, including confidence/credible intervals. <i>In larger networks, authors may focus on comparisons versus a particular comparator (e.g. placebo or standard care), with full findings presented in an appendix. League tables and forest plots may be considered to summarize pairwise comparisons.</i> If additional summary measures were explored (such as treatment rankings), these should also be presented. | Table 2, Figure 3, Figure 4 Figure S2-S4 |
| <b>Exploration for inconsistency</b>     | <b>S5</b> | Describe results from investigations of inconsistency. This may include such information as measures of model fit to compare consistency and inconsistency models, <i>P</i> values from statistical tests, or summary of inconsistency estimates from different parts of the treatment network.                                                                                                                                                              | Table S4                                 |
| Risk of bias across studies              | 22        | Present results of any assessment of risk of bias across studies for the evidence base being studied.                                                                                                                                                                                                                                                                                                                                                        | Figure S1                                |
| Results of additional analyses           | 23        | Give results of additional analyses, if done (e.g., sensitivity or subgroup analyses, meta-regression analyses, <i>alternative network geometries studied, alternative choice of prior distributions for Bayesian analyses, and so forth).</i>                                                                                                                                                                                                               | 10, Figure S4, S5, S6                    |

|                     |    |                                                                                                                                                                                                                                                                                                                                                                                                                                |    |
|---------------------|----|--------------------------------------------------------------------------------------------------------------------------------------------------------------------------------------------------------------------------------------------------------------------------------------------------------------------------------------------------------------------------------------------------------------------------------|----|
| <b>DISCUSSION</b>   |    |                                                                                                                                                                                                                                                                                                                                                                                                                                |    |
| Summary of evidence | 24 | Summarize the main findings, including the strength of evidence for each main outcome; consider their relevance to key groups (e.g., healthcare providers, users, and policy-makers).                                                                                                                                                                                                                                          | 10 |
| Limitations         | 25 | Discuss limitations at study and outcome level (e.g., risk of bias), and at review level (e.g., incomplete retrieval of identified research, reporting bias). <i>Comment on the validity of the assumptions, such as transitivity and consistency. Comment on any concerns regarding network geometry (e.g., avoidance of certain comparisons).</i>                                                                            | 11 |
| Conclusions         | 26 | Provide a general interpretation of the results in the context of other evidence, and implications for future research.                                                                                                                                                                                                                                                                                                        | 12 |
| <b>FUNDING</b>      |    |                                                                                                                                                                                                                                                                                                                                                                                                                                |    |
| Funding             | 27 | Describe sources of funding for the systematic review and other support (e.g., supply of data); role of funders for the systematic review. This should also include information regarding whether funding has been received from manufacturers of treatments in the network and/or whether some of the authors are content experts with professional conflicts of interest that could affect use of treatments in the network. | 1  |

PICOS = population, intervention, comparators, outcomes, study design.

\* Text in italics indicates wording specific to reporting of network meta-analyses that has been added to guidance from the PRISMA statement.

† Authors may wish to plan for use of appendices to present all relevant information in full detail for items in this section.

**Table S2: Efficacy Outcomes as reported in individual studies.**

| Trial Name or Author/Year | Comparison                      | Median PFS (months)          | HR (95% CI) for PFS                                                                                | ORR (percentage)             | Median OS (months)         |
|---------------------------|---------------------------------|------------------------------|----------------------------------------------------------------------------------------------------|------------------------------|----------------------------|
| IFM 95-01 /2006           | MP vs Dex vs Mel_Dex vs Dex_IFN | 21.1 vs 22.9 vs 12.2 vs 15.2 | 0.86 (0.65-1.13)<br>(MD vs MP)<br>1.7 (1.3-1.22)<br>(D vs MP)<br>1.46 (1.12-1.92)<br>(D-IFN vs MP) | 41.3 vs 40.4 vs 70% vs 41.6% | 34 vs 33.4 vs 39.6 vs 32.9 |
| IFM 01-01 /2006           | MPT vs MP                       | 24.1 vs 18.5                 | 0.67 (0.47-0.82)                                                                                   | 61.7 vs 31.2%                | 44 vs 29.1                 |
| GIMEMA /2006              | MPT_T vs MP                     | 21.8 vs 14.5                 | 0.62 (0.48-0.81)                                                                                   | 68.5 vs 47.5%                | 45 vs 47.6                 |
| IFM 99-06/2007            | MPT vs MP vs Mel100             | 27.5 vs 17.8 vs 19.4         | 0.51 (0.39-0.66)                                                                                   | 76 vs 34.5 vs 64.8%          | 51.6 vs 33.2 vs 38.3       |
| MM003/2008                | TD vs Dex                       | 14.9 vs 6.5                  | 0.5 (0.38-0.64)                                                                                    | 62.9 vs 45.9%                | NR                         |
| VISTA/2008                | VMP vs MP                       | 21.7 vs 15.2                 | 0.56 (0.43-0.72)                                                                                   | 74.5 vs 38.7%                | 56.4 vs 43.1               |
| HOVON-49/2009             | MPT-T vs MP                     | 15 vs 11                     | 0.79 (0.62-1.0)                                                                                    | 66.1 vs 45.2%                | 40 vs 31                   |
| Ludwig/2009               | TD vs MP                        | 16.7 vs 20.7                 | 1.3 (0.95-1.78)                                                                                    | 68.3 vs 50%                  | 41.5 vs 49.4               |
| NMSG/2010                 | MPT-T vs MP                     | 15 vs 14                     | 0.89 (0.7-1.13)                                                                                    | 66.2 vs 43.2%                | 29 vs 32                   |
| PETHEMA/2010              | VMP vs VTP                      | 34 vs 25                     | 1.2 (0.9-1.7)                                                                                      | 80 vs 80.8%                  | NR                         |
| S0232/2010                | RD vs Dex                       | NA                           | 0.57 (0.4-0.82)                                                                                    | 77.9 vs 47.5%                | NR                         |
| GIMEMA0305/2010           | VMPT-VT vs VMP                  | NR vs 27.3                   | 0.67 (0.5-0.9)                                                                                     | 88.8 vs 81.0%                | NR                         |
| TMSG/2011                 | MPT vs MP                       | 21 vs 14                     | 0.7 (0.42-1.17)                                                                                    | 57.9 vs 37.5%                | 26 vs 28                   |
| Sacchi/2011               | MPT vs MP                       | 33 vs 22                     | 0.58 (0.35-0.97)                                                                                   | 79.7 vs 50%                  | 52 vs 32                   |
| MRC IX/2011               | CTD vs MP                       | 13 vs 12.4                   | 0.82 (0.7-0.96)                                                                                    | 63.8 vs 32.6%                | 33.2 vs 30.6               |
| MM015/2012                | MPR-R vs MPR vs MP              | 31 vs 14 vs 13               | 0.79 (0.53-1.18)<br>(MPR-R vs MPR)<br>0.95 (0.62-1.44)<br>(MPR-R vs MP)                            | 80.7 vs 71.2 vs 52.4%        | NR                         |
| FIRST/2014                | RD vs RD18 vs MPT               | 26 vs 21 vs 21.9             | 0.69 (0.59-0.79)                                                                                   | 80.7 vs 78.6 vs 67.5%        | 59.1 vs 62.3 vs 49.1       |
| San-Miguel /2014          | VMP_Siltuximab vs VMP           | 19 vs 17.2                   | 1 (0.58-1.75)                                                                                      | 87.7 vs 79.6%                | NR                         |
| UPFRONT/2015              | VMP vs VD vs VTD                | 17.3 vs 14.7 vs 15.4         | <b>0.92 (0.69-1.22)</b>                                                                            | 69.7 vs 79.7 vs 72.8%        | 53.1 vs 49.8 vs 51.5       |
| E1A06/2015                | MPT-T vs MPR-R                  | 20.9 vs 18.7                 | 0.84 (0.64-1.09)                                                                                   | 75.6 vs 70.2%                | 52.6 vs 47.7               |
| HOVON87/2016              | MPT-T vs MPR-R                  | 20 vs 23                     | 0.87 (0.72-1.04)                                                                                   | 81.1 vs 83.7%                | NR                         |
| GEMOH/2016                | MPT vs CTD vs TD                | 24.1 vs 25.9                 | 0.89 (0.69-1.64)                                                                                   | 67.9 vs 89.7%                | 42 vs 32.4                 |
| EMN01/2016                | MPR-R vs CPR vs RD              | 24 vs 20 vs 21               | 0.79 (0.63-1.01)<br>(MPR-R vs CPR)<br>0.81 (0.63 -1.03)<br>(MPR-R vs RD)                           | 71.1 vs 68.2 vs 74.1%        | NR                         |
| Mateos/2016               | VMP_RD_seq vs VMP_VD            | 32 vs 24                     | 1.09 (0.65-1.57)                                                                                   | 76.3 vs 80%                  | NR                         |
| S0777/2017                | VRD vs RD                       | 43 vs 30                     | 0.71 (0.56-0.91)                                                                                   | 81.5 vs 71.5%                | 75 vs 64                   |
| ALCYONE/2018              | VMP_Dara vs VMP                 | NR vs 19.1                   | 0.43 (0.35-0.54)                                                                                   | 90.9 vs 73.9%                | NA                         |
| MAIA/2019                 | Dara_RD vs RD                   | NR vs 31.9                   | 0.55 (0.43-0.72)                                                                                   | 92.9 vs 81%                  | NR                         |

NA: not available, NR: Not reached, PFS: Progression free survival, TTP: Time to progression, OS: Overall survival

Study regimens are defined as follows: Dexamethasone (Dex); Dexamethasone-Interferon alpha (Dex\_IFN); Melphalan 100 (MEL100); Melphalan Dexamethasone (Mel\_DexD); Melphalan Prednisone (MP) ; Thalidomide Dexamethasone (TD); Continuous Lenalidomide Dexamethasone (RD); Lenalidomide Dexamethasone for 18 cycles (RD18); Bortezomib Dexamethasone (VD); Melphalan Prednisone Thalidomide (MPT); Melphalan Prednisone Thalidomide followed by Thalidomide maintenance (MPT\_T); Melphalan Prednisone Lenalidomide (MPR); Melphalan Prednisone Lenalidomide followed by Lenalidomide maintenance (MPR\_R); Cyclophosphamide Prednisone Lenalidomide (CPR); Cyclophosphamide Thalidomide Dexamethasone (CTD); Bortezomib Melphalan Prednisone (VMP); Daratumumab Lenalidomide Dexamethasone (Dara\_RD); Bortezomib Thalidomide Prednisone (VTP); Bortezomib Thalidomide Dexamethasone (VTD); Bortezomib Lenalidomide Dexamethasone (VRD); Bortezomib Melphalan Prednisone Siltuximab (VMP\_Siltuximab); Bortezomib Melphalan Prednisone

Thalidomide followed by Bortezomib Thalidomide maintenance (VMPT\_VT); VMP plus Daratumumab (VMP\_Dara); Bortezomib Melphalan Prednisone followed by Lenalidomide Dexamethasone in a sequential (VMP\_RD\_Seq) vs alternating regimen (VMP\_RD\_alt).

**Table S3: Grade 3/4 Adverse Events reported by at least 50% of the studies and included in toxicity analysis:**

| Trial Name or Author/ Year | Comparison                      | Neutropenia      | Anemia           | Thrombocytopenia | Infections           | Neuropathy      | Thrombosis        |
|----------------------------|---------------------------------|------------------|------------------|------------------|----------------------|-----------------|-------------------|
| IFM 95-01 /2006            | MP vs Dex vs Mel_Dex vs Dex_IFN | NA               | NA               | NA               | 10 vs 11 vs 19 vs 9% | NA              | 4 vs 5 vs 5 vs 3% |
| IFM 01-01 /2006            | MPT vs MP                       | 23 vs 9%         | NA               | NA               | NA                   | 2 vs 2%         | 6 vs 3%           |
| GIMEMA /2006               | MPT_T vs MP                     | 16 vs 17%        | 3 vs 4%          | 3 vs 4%          | 9 vs 2%              | 8 vs 0%         | 12 vs 2%          |
| IFM 99-06/2007             | MPT vs MP vs Mel100             | 48 vs 26 vs 100% | 14 vs 14 vs 100% | 14 vs 10 vs 100% | 13 vs 9 vs 49%       | 6 vs 0 vs 0 %   | 12 vs 4 vs 8%     |
| MM003/2008                 | TD vs Dex                       | 3 vs 2%          | 6 vs 3%          | NA               | BA                   | NA              | 11 vs 2%          |
| VISTA/2008                 | VMP vs MP                       | 40 vs 38%        | 18 vs 27%        | 37 vs 30%        | 6 vs 5%              | 13 vs 0%        | 1 vs 1%           |
| HOVON-49/2009              | MPT_T vs MP                     | NA               | NA               | NA               | 28 vs 18%            | 23 vs 4%        | 3 vs 0%           |
| Ludwig/2009                | TD vs MP                        | 3 vs 15%         | 4 vs 11%         | 1 vs 12%         | 13 vs 8%             | 7 vs 1%         | 10 vs 4%          |
| NMSG/2010                  | MPT_T vs MP                     | 25 vs 20%        | 4 vs 8%          | 8 vs 11%         | 15 vs 10%            | 6 vs 1%         | 12 vs 12%         |
| PETHEMA/2010               | VMP vs VTP                      | 39 vs 22%        | 39 vs 22%        | 12 vs 8%         | 27 vs 12%            | 7 vs 1%         | 1 vs 2%           |
| S0232/2010                 | RD vs Dex                       | 22 vs 5%         | 6 vs 5%          | 7 vs 3%          | 17 vs 12%            | 3 vs 4%         | 20 vs 5%          |
| GIMEMA0305/2010            | VMPT-VT vs VMP                  | 38 vs 28%        | 10 vs 10%        | 22 vs 20%        | 13 vs 9%             | 8 vs 5%         | 3 vs 2%           |
| TMSG/2011                  | MPT vs MP                       | NA               | NA               | NA               | 22 vs 7%             | 9 vs 3%         | 2 vs 5%           |
| Sacchi/2011                | MPT vs MP                       | 28 vs 13%        | NA               | NA               | 9 vs 2%              | 6 vs 0%         | 11 vs 0%          |
| MRC IX/2011                | CTD vs MP                       | NA               | NA               | NA               | 13 vs 7%             | 3 vs 1%         | 16 vs 5 %         |
| MM015/2012                 | MPR_R vs MPR vs MP              | 67 vs 64 vs 70%  | 24 vs 26 vs 14%  | 35 vs 38 vs 17%  | 9 vs 12 vs 7%        | NA              | 1 vs 4 vs 1%      |
| FIRST/2014                 | RD vs RD18 vs MPT               | 28 vs 26 vs 15%  | 18 vs 16 vs 10%  | 8 vs 8 vs 11%    | 29 vs 22 vs 17%      | 1 vs 0 vs 9%    | 8 vs 6 vs 5%      |
| San-Miguel /2014           | VMP Siltuximab vs VMP           | 62 vs 43%        | 13 vs 13%        | 44 vs 25%        | 17 vs 17%            | 6 vs 9%         | NA                |
| UPFRONT/2015               | VMP vs VD vs VTD                | 19 vs 3 vs 2%    | 7 vs 2 vs 6%     | 15 vs 4 vs 2%    | 6 vs 10 vs 6%        | 20 vs 22 vs 27% | 1 vs 4 vs 3%      |
| E1A06/2015                 | MPT_T vs MPR_R                  | 28 vs 29%        | 11 vs 7%         | 12 vs 9%         | NA                   | NA              | 9 vs 6%           |
| HOVON87/2016               | MPT_T vs MPR_R                  | 27 vs 63%        | 5 vs 14%         | 8 vs 27%         | 19 vs 16%            | NA              | 7 vs 5%           |
| GEMOH/2016                 | MPT vs CTD vs TD                | 34 vs 19 vs 50%  | 34 vs 19 vs 60%  | 3 vs 9 vs 11%    | NA                   | 13 vs 16 vs 22% | 19 vs 3 vs 17%    |
| EMN01/2016                 | MPR-R vs CPR vs RD              | 64 vs 29 vs 75%  | 15 vs 6 vs 4%    | 18 vs 9 vs 7%    | 11 vs 7 vs 9%        | 3 vs 3 vs 2%    | 3 vs 5 vs 2%      |
| Mateos/2016                | VMP_RD_seq vs VMP_RD_Alt        | 19 vs 23%        | 3 vs 3%          | 21 vs 20%        | 6 vs 7%              | 4 vs 3%         | 4 vs 3%           |
| S0777/2017                 | VRD vs RD                       | NA               | NA               | NA               | 14 vs 14%            | 33 vs 11%       | 2 vs 1%           |
| ALCYONE/2018               | VMP_Dara vs VMP                 | 40 vs 39%        | 16 vs 20%        | 34 vs 38%        | 23 vs 15%            | 1 vs 4%         | NA                |
| MAIA/2019                  | Dara_RD vs RD                   | 50 vs 35%        | 12 vs 20%        | 7 vs 9%          | 14 vs 8%             | NA              | 12 vs 13%         |

Study regimens are defined as follows: Dexamethasone (Dex); Dexamethasone-Interferon alpha (Dex\_IFN); Melphalan 100 (MEL100); Melphalan Dexamethasone (Mel\_DexD); Melphalan Prednisone (MP); Thalidomide Dexamethasone (TD); Continuous Lenalidomide Dexamethasone (RD); Lenalidomide Dexamethasone for 18 cycles (RD18); Bortezomib Dexamethasone (VD); Melphalan Prednisone Thalidomide (MPT); Melphalan Prednisone Thalidomide followed by Thalidomide maintenance (MPT\_T); Melphalan Prednisone Lenalidomide (MPR); Melphalan Prednisone Lenalidomide followed by Lenalidomide maintenance (MPR\_R); Cyclophosphamide Prednisone Lenalidomide (CPR); Cyclophosphamide Thalidomide Dexamethasone (CTD); Bortezomib Melphalan Prednisone (VMP); Daratumumab Lenalidomide Dexamethasone (Dara\_RD); Bortezomib Thalidomide Prednisone (VTP); Bortezomib Thalidomide Dexamethasone (VTD); Bortezomib Lenalidomide Dexamethasone (VRD); Bortezomib Melphalan Prednisone Siltuximab (VMP\_Siltuximab); Bortezomib Melphalan Prednisone Thalidomide followed by Bortezomib Thalidomide maintenance (VMPT\_VT); VMP plus Daratumumab (VMP\_Dara); Bortezomib Melphalan Prednisone followed by Lenalidomide Dexamethasone in a sequential (VMP\_RD\_Seq) vs alternating regimen (VMP\_RD\_alt).



**Table S4: Assessment of Model fit and convergence using Gelman-Rubin Diagnostics.**

| <b>Outcome</b> | <b>Dbar</b> | <b>pD</b> | <b>DIC</b> | <b>I<sup>2</sup></b> | <b>Multivariate PSRF*</b> |
|----------------|-------------|-----------|------------|----------------------|---------------------------|
| <b>PFS</b>     | 32.62       | 30.28     | 62.90      | 2%                   | 1.01                      |
| <b>OS</b>      | 30.43       | 26.34     | 56.77      | 1%                   | 1.01                      |
| <b>ORR</b>     | 60.63       | 52.68     | 113.30     | 4%                   | 1.01                      |
| <b>AE</b>      | 49.82       | 47.60     | 97.42      | 2%                   | 1.01                      |

PSRF, Posterior scale reduction factor. PSRF values close to 1 indicates good convergence.

|                 | Random Sequence Generation | Allocation Concealment | Blinding of Participants and Personnel | Blinding of Outcome Assessors | Incomplete Outcome Data | Selective Reporting | Other Bias |
|-----------------|----------------------------|------------------------|----------------------------------------|-------------------------------|-------------------------|---------------------|------------|
| Beksac 2011     | ?                          | +                      | ?                                      | ?                             | +                       | +                   | ?          |
| Bernbouker 2014 | +                          | +                      | ?                                      | +                             | +                       | +                   | +          |
| Bringham 2017   | ?                          | ?                      | ?                                      | ?                             | +                       | +                   | +          |
| Durie 2017      | +                          | +                      | ?                                      | +                             | +                       | +                   | +          |
| Facon 2007      | ?                          | ?                      | ?                                      | ?                             | +                       | +                   | +          |
| Facon 2006      | +                          | +                      | ?                                      | ?                             | +                       | +                   | +          |
| Facon 2019      | +                          | +                      | ?                                      | +                             | +                       | +                   | +          |
| Hulin 2009      | +                          | +                      | +                                      | +                             | +                       | +                   | +          |
| Hungrja 2016    | ?                          | ?                      | ?                                      | ?                             | +                       | +                   | +          |
| Ludwig 2009     | +                          | +                      | ?                                      | ?                             | +                       | +                   | +          |
| Mateos 2018     | +                          | +                      | ?                                      | +                             | +                       | +                   | ?          |
| Mateos 2016     | +                          | +                      | ?                                      | ?                             | +                       | +                   | +          |
| Mateos 2010     | +                          | +                      | ?                                      | ?                             | +                       | +                   | +          |
| Morgan 2011     | +                          | +                      | ?                                      | ?                             | +                       | +                   | +          |
| Niesvizky 2013  | +                          | +                      | ?                                      | ?                             | +                       | +                   | +          |
| Palumbo 2006    | +                          | +                      | ?                                      | ?                             | +                       | +                   | +          |
| Palumbo 2010    | ?                          | ?                      | ?                                      | ?                             | +                       | +                   | +          |
| Palumbo 2012    | +                          | +                      | +                                      | +                             | +                       | +                   | -          |
| Rajkumar 2006   | ?                          | ?                      | ?                                      | ?                             | +                       | +                   | +          |
| Sacchi 2011     | +                          | +                      | ?                                      | ?                             | +                       | +                   | +          |
| San Miguel 2014 | ?                          | ?                      | ?                                      | +                             | +                       | +                   | +          |
| San-Miguel 2008 | ?                          | ?                      | ?                                      | +                             | +                       | +                   | +          |
| Stewart 2015    | +                          | +                      | ?                                      | ?                             | +                       | +                   | +          |
| Waage 2010      | +                          | +                      | +                                      | +                             | +                       | +                   | +          |
| Wijermans 2010  | +                          | +                      | ?                                      | ?                             | +                       | +                   | +          |
| Zonder 2010     | +                          | +                      | +                                      | ?                             | +                       | +                   | +          |
| Zweegman 2016   | +                          | +                      | ?                                      | ?                             | +                       | +                   | +          |

**Figure S1: Quality Assessment of the included studies using Cochrane Risk of Bias Assessment Tool.** Of the 27 studies, 19 had low risk for bias in random sequence generation (selection bias, 70%) and 20 in allocation concealment (selection bias, 74%). All but four studies were open label studies and blinding of outcome assessment was done by nine studies (detection bias, 33%). All studies had low risk for bias of incomplete outcome data (attrition bias) or selective reporting (reporting bias)

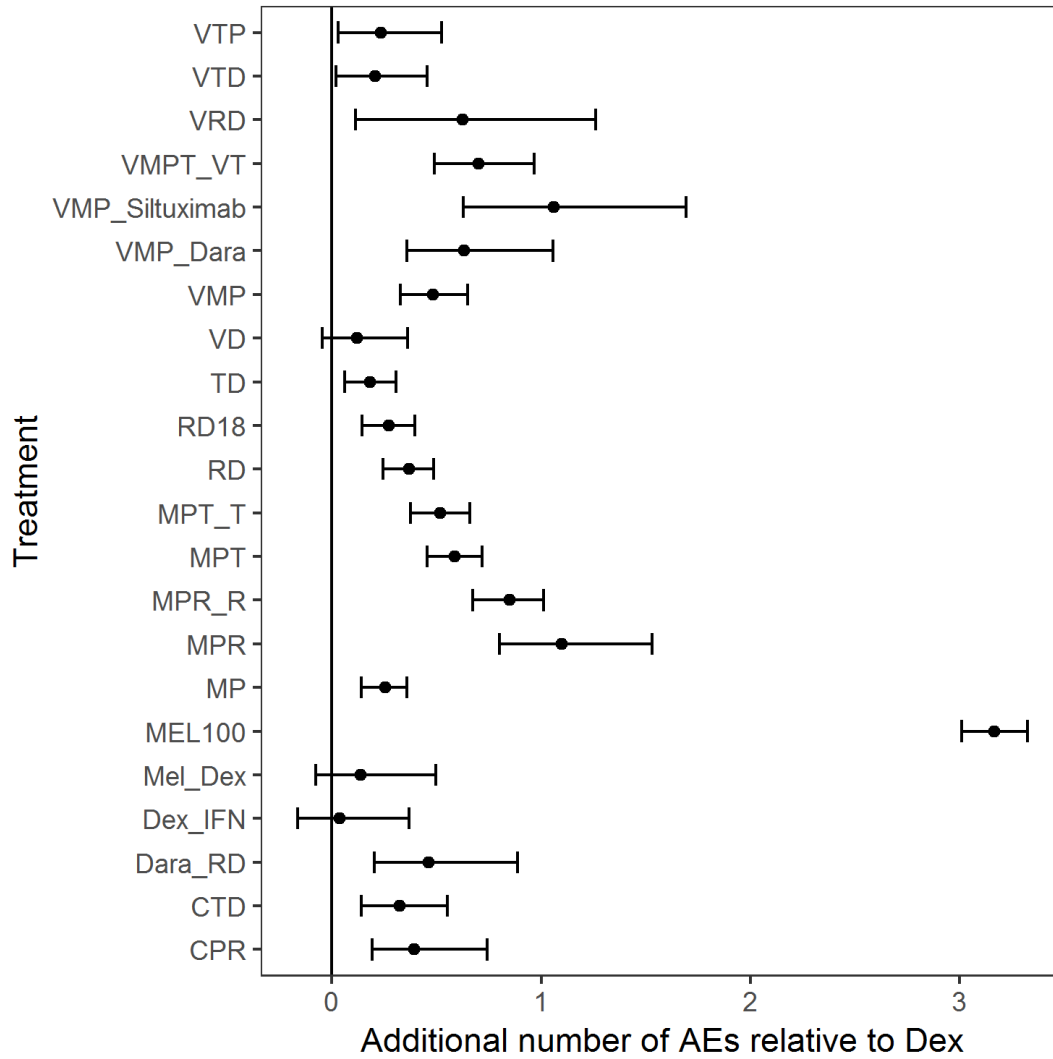

Figure S2: Expected additional number (with 95% credible interval) of Adverse Events for each patient relative to Dexamethasone. As compared to dexamethasone, the expected additional number (with 95% credible interval) of AEs for each study patient was the highest in the following arms: reduced intensity transplantation (MEL-100, 3.449, 95% CrI 3.31-3.59, SUCRA 0), followed by Melphalan, prednisone and lenalidomide, MPR (1.38, 95% CrI 1.09-1.81; SUCRA 0.074) and VMP plus Siltuximab (1.34, 95% CrI 0.92-1.97; SUCRA 0.095)

|                                             | <i>Studies reporting</i> | <i>Proportion reporting</i> | <i>Highest % observed</i> |
|---------------------------------------------|--------------------------|-----------------------------|---------------------------|
| <i>Thrombosis</i>                           | 24                       | 92%                         | 13%                       |
| <i>Neutropenia</i>                          | 21                       | 81%                         | 53%                       |
| <i>Neuropathy</i>                           | 21                       | 81%                         | 23%                       |
| <i>Infections</i>                           | 20                       | 77%                         | 23%                       |
| <i>Anemia</i>                               | 19                       | 73%                         | 38%                       |
| <i>Thrombocytopenia</i>                     | 18                       | 69%                         | 36%                       |
| <i>Constipation</i>                         | 15                       | 58%                         | 12%                       |
| <b><i>Rash</i></b>                          | 13                       | 50%                         | 6%                        |
| <b><i>Fatigue</i></b>                       | 11                       | 42%                         | 16%                       |
| <b><i>Pneumonia</i></b>                     | 11                       | 42%                         | 11%                       |
| <b><i>CardiacAes</i></b>                    | 11                       | 42%                         | 9%                        |
| <b><i>Diarrhea</i></b>                      | 10                       | 38%                         | 9%                        |
| <b><i>SecondCancer</i></b>                  | 9                        | 35%                         | 11%                       |
| <b><i>HematologicAEs</i></b>                | 8                        | 31%                         | 50%                       |
| <b><i>Nausea</i></b>                        | 8                        | 31%                         | 12%                       |
| <b><i>PE</i></b>                            | 6                        | 23%                         | 4%                        |
| <b><i>Pyrexia_FUO</i></b>                   | 5                        | 19%                         | 7%                        |
| <b><i>HerpesZoster</i></b>                  | 5                        | 19%                         | 3%                        |
| <b><i>Asthenia</i></b>                      | 5                        | 19%                         | 7%                        |
| <b><i>GI_AE</i></b>                         | 5                        | 19%                         | 15%                       |
| <b><i>Edema</i></b>                         | 5                        | 19%                         | 3%                        |
| <b><i>Hyperglycemia</i></b>                 | 5                        | 19%                         | 12%                       |
| <b><i>Dyspnea</i></b>                       | 4                        | 15%                         | 6%                        |
| <b><i>Hypokalemia</i></b>                   | 4                        | 15%                         | 7%                        |
| <b><i>Back_pain</i></b>                     | 4                        | 15%                         | 6%                        |
| <b><i>Neurotoxicity_non_neuropathic</i></b> | 3                        | 12%                         | 16%                       |
| <b><i>PsychiatricComplications</i></b>      | 3                        | 12%                         | 10%                       |
| <b><i>URI</i></b>                           | 2                        | 8%                          | 2%                        |
| <b><i>Neuralgia</i></b>                     | 2                        | 8%                          | 5%                        |
| <b><i>InfusionReactions</i></b>             | 1                        | 4%                          | 2%                        |
| <b><i>Anorexia</i></b>                      | 1                        | 4%                          | 2%                        |
| <b><i>Dehydration</i></b>                   | 1                        | 4%                          | 5%                        |
| <b><i>Dizziness</i></b>                     | 1                        | 4%                          | 2%                        |

**Figure S3: Number of studies reporting each Adverse Effects.** Information on 33 AEs was collected, among which 7 were reported by over 50% studies (bolded) and was used for toxicity analysis.

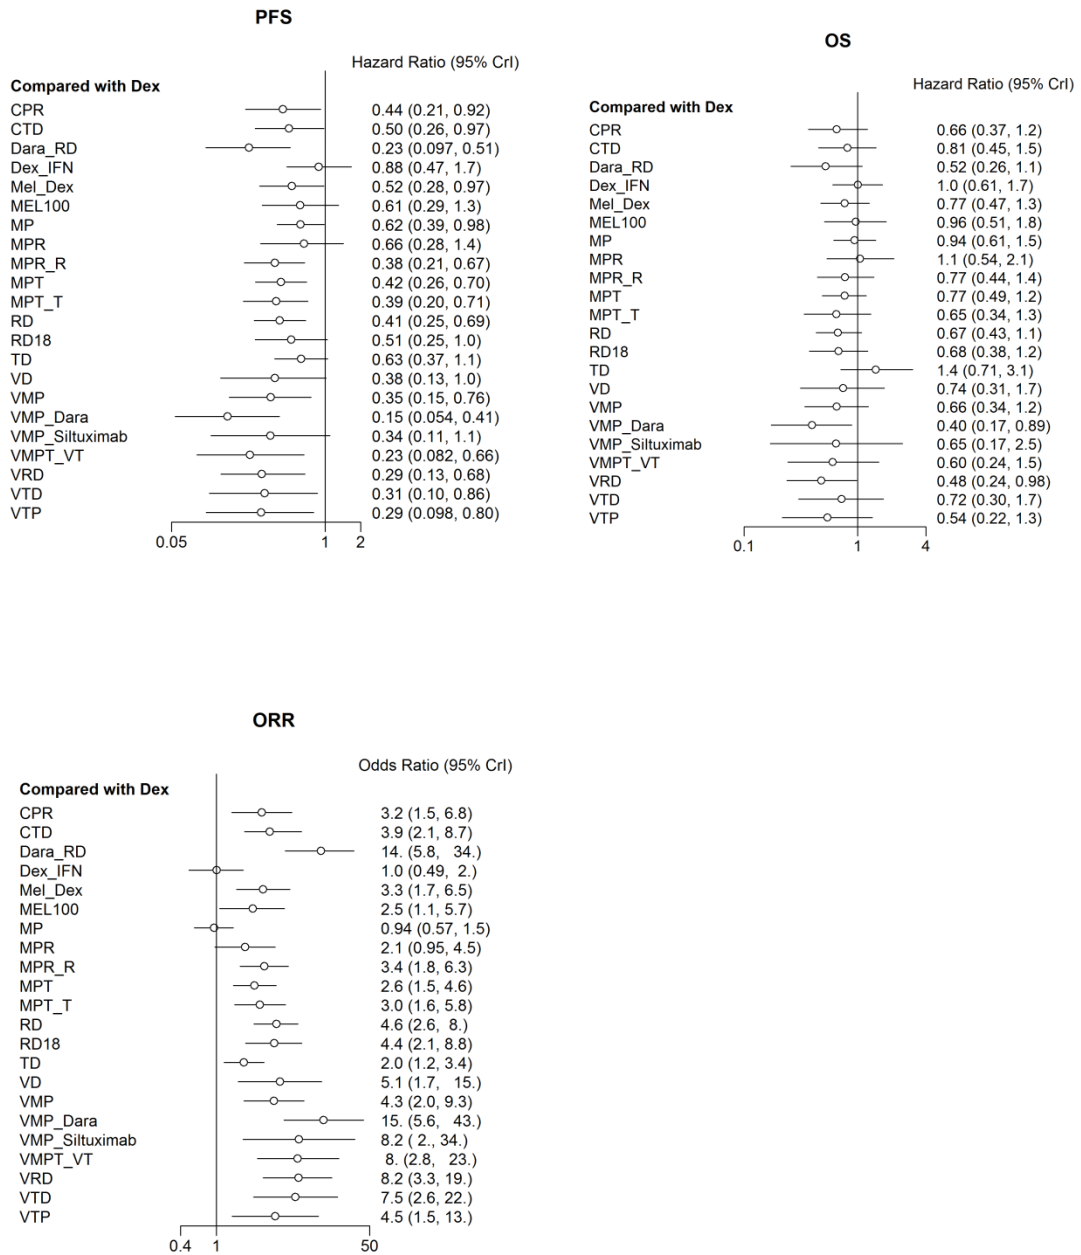

**Figure S4: Sensitivity analysis regrouping MPT-T as MPT. Upon re-grouping the study by Waage et al, Palumbo et al and Wijermans et al as MPT instead of MPT\_T, we found that our overall results remained unchanged with VMP\_Dara, Dara\_RD, VMPT\_VT and VRD being the four most effective regimens for progression free survival.**

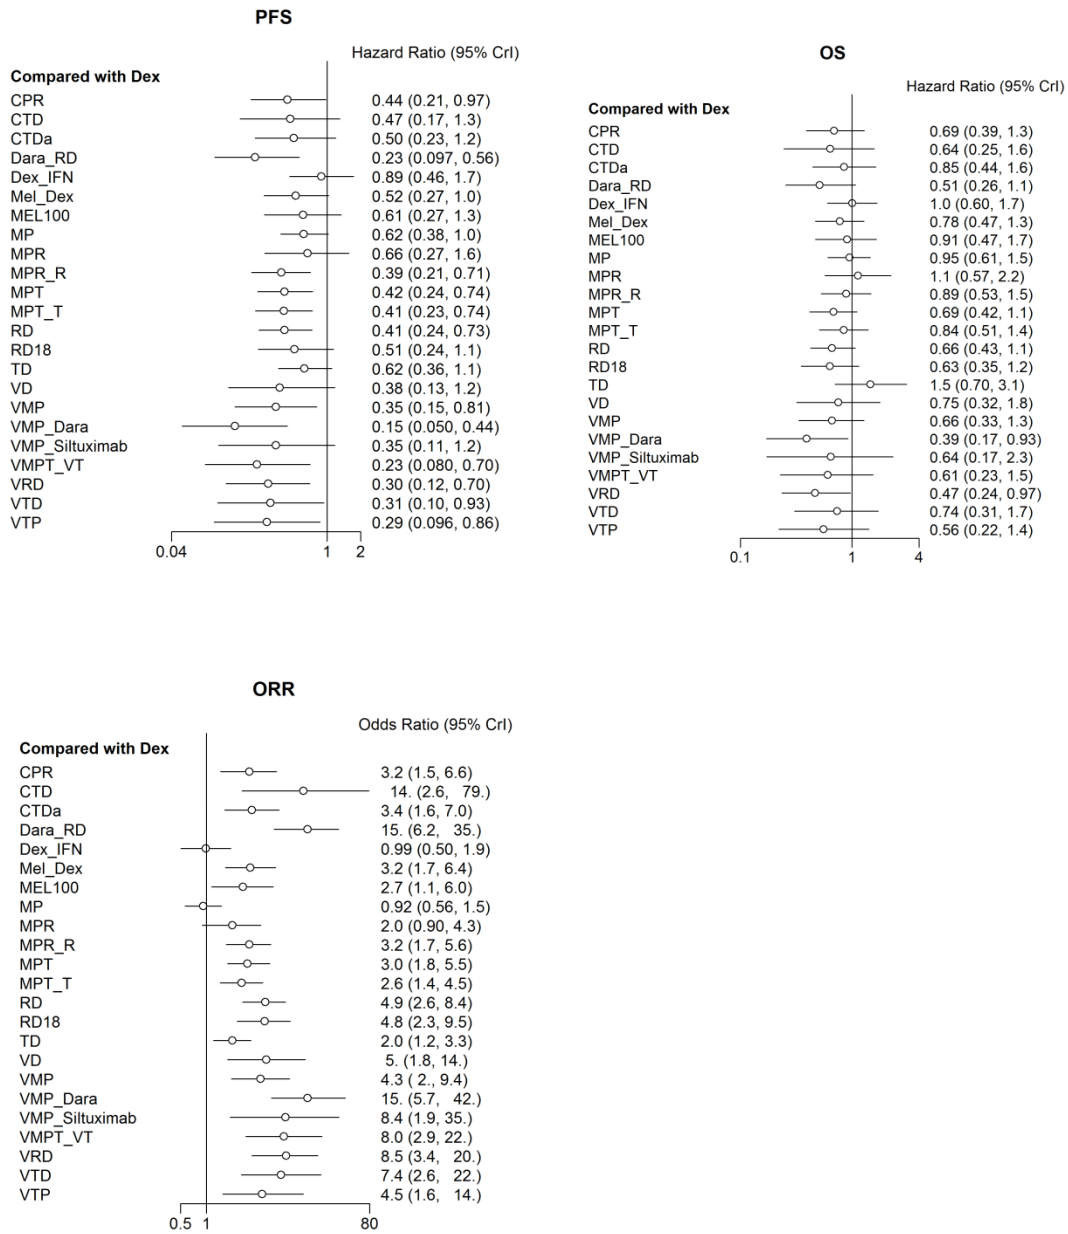

**Figure S5: Sensitivity analysis by breaking down into CTD as CTD or attenuated CTD (CTDa). Upon separating CTD regimen studied by Hungria et al and Morgan et al, characterizing the latter as an attenuated CTD regimen (CTDa), we found that our overall results remained unchanged.**

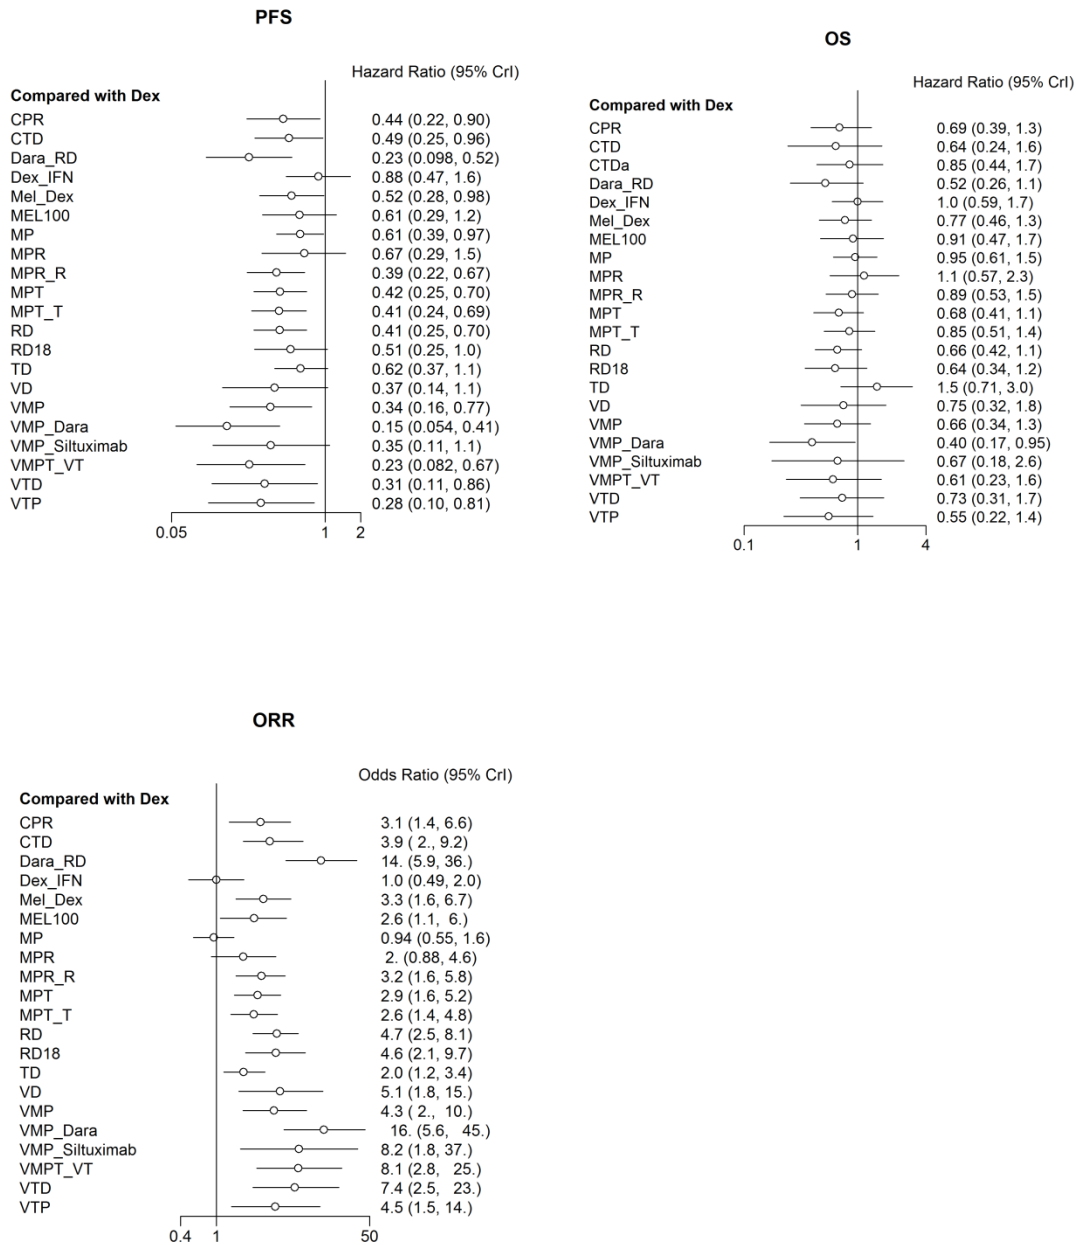

**Figure S6: Sensitivity analysis removing SWOG S077 study from the analysis.** We found no difference in our overall results with VMP\_Dara, Dara\_RD and VMPT\_VT still being the top three most efficacious regimens in terms of progression free survival as well as Overall Response Rate.
